# Supplementary material for: Assessment of Cost and Benefit Associated with Ecological Restoration in Ghana: A Case Study in Bekwai Municipal Area
Source: Preprints.org preprint supplement (doi:10.20944/preprints202004.0544.v1), 2020-04-30
Supplement: Supplementary file 1 [file Table 2.docx]

Table 3. Green, Dry weight and weight of Carbon of trees

|  | TREE | GPS COODINATES | | w(Ibs) | w(Ibs) | w(Ibs) | (wD)Ibs | (wD)Ibs | (wD)Ibs | (WC)Ibs | (WC)Ibs | (WC)Ibs |
| --- | --- | --- | --- | --- | --- | --- | --- | --- | --- | --- | --- | --- |
| Tree code | | X | Y | 2017 | 2018 | 2019 | 2017 | 2018 | 2019 | 2017 | 2018 | 2019 |
| A1 | Asanfna-1 | 607540 | 583495 | 82.06007 | 250.6649 | 550.722 | 59.49355 | 181.7321 | 399.2735 | 29.74678 | 90.86603 | 275.361 |
| A2 | Asanfna-2 | 607524 | 583475 | 108.8598 | 277.9185 | 726.9845 | 78.92336 | 201.4909 | 527.0637 | 39.46168 | 100.7454 | 363.4922 |
| C1 | Cedrela-1 | 607455 | 583497 | 151.0427 | 366.6016 | 781.9408 | 109.5059 | 265.7862 | 566.9071 | 54.75297 | 132.8931 | 390.9704 |
| C2 | Cedrela-2 | 607541 | 583409 | 48.2128 | 148.257 | 559.872 | 34.95428 | 107.4863 | 405.9072 | 17.47714 | 53.74316 | 279.936 |
| C3 | Cedrela-3 | 607532 | 583470 | 85.4708 | 220.6206 | 549.8066 | 61.96633 | 159.9499 | 398.6097 | 30.98316 | 79.97497 | 274.9033 |
| C4 | Cedrela-4 | 607529 | 583471 | 103.7851 | 298.829 | 800.7791 | 75.24417 | 216.6511 | 580.5649 | 37.62209 | 108.3255 | 400.3896 |
| E1 | Emire-1 | 607480 | 583474 | 57.71411 | 167.7629 | 453.4963 | 41.84273 | 121.6281 | 328.7848 | 20.92136 | 60.81406 | 226.7482 |
| E2 | Emire-2 | 607503 | 583452 | 38.63583 | 110.8679 | 429.4095 | 28.01098 | 80.37921 | 311.3219 | 14.00549 | 40.1896 | 214.7048 |
| E3 | Emire-3 | 607443 | 583565 | 33.7008 | 183.7121 | 522.4128 | 24.43308 | 133.1912 | 378.7493 | 12.21654 | 66.59562 | 261.2064 |
| ED1 | Edinam-1 | 607506 | 583468 | 40.43965 | 101.3405 | 397.488 | 29.31875 | 73.47185 | 288.1788 | 14.65937 | 36.73593 | 198.744 |
| ED2 | Edinam-2 | 607522 | 583533 | 37.67181 | 160.9787 | 636.1321 | 27.31206 | 116.7096 | 461.1958 | 13.65603 | 58.35479 | 318.066 |
| ED3 | Edinam-3 | 607495 | 583574 | 46.55487 | 149.8651 | 593.7604 | 33.75228 | 108.6522 | 430.4763 | 16.87614 | 54.32609 | 296.8802 |
| G1 | Glicidea-1 | 607456 | 583568 | 101.2095 | dead | dead | 73.37689 | dead | dead | 36.68844 | dead | dead |
| G2 | Glicidea-2 | 607504 | 583572 | 139.6646 | 499.9566 | 1028.594 | 101.2568 | 362.4686 | 745.7305 | 50.62842 | 181.2343 | 514.2969 |
| G3 | Glicidea-3 | 607543 | 583510 | 107.6345 | 245.9356 | 868.8 | 78.03502 | 178.3033 | 629.88 | 39.01751 | 89.15165 | 434.4 |
| G4 | Glicidea-4 | 607539 | 583436 | 174.8983 | dead | dead | 126.8013 | dead | dead | 63.40065 | dead | dead |
| K1 | Kyenken-1 | 607480 | 583515 | 108.6464 | 312.6048 | 710.9478 | 78.76862 | 226.6385 | 515.4372 | 39.38431 | 113.3192 | 355.4739 |
| K2 | Kyenken-2 | 607498 | 583490 | 74.32352 | 230.3827 | 680.5839 | 53.88455 | 167.0274 | 493.4233 | 26.94227 | 83.51372 | 340.292 |
| LI | Lucinea-1 | 607472 | 583584 | 95.63067 | 371.2178 | 1005.48 | 69.33224 | 269.1329 | 728.973 | 34.66612 | 134.5665 | 502.74 |
| L2 | Lucinea-2 | 607445 | 583584 | 151.9382 | 390.7145 | 1044.177 | 110.1552 | 283.268 | 757.0281 | 55.07761 | 141.634 | 522.0883 |
| CG1 | Cola gigantea-1 | 607495 | 583574 | 100.5527 | 251.9214 | 915.1795 | 72.90067 | 182.643 | 663.5052 | 36.45034 | 91.32151 | 457.5898 |
| CG2 | Cola gigantea-2 | 607497 | 583580 | 140.6141 | 319.923 | 860.9193 | 101.9452 | 231.9442 | 624.1665 | 50.97261 | 115.9721 | 430.4596 |
| TS1 | Triplochiton sclerocylon-1 | 607532 | 583472 | 60.38698 | 307.525 | 961.6536 | 43.78056 | 222.9556 | 697.1989 | 21.89028 | 111.4778 | 480.8268 |
| TS2 | Triplochiton sclerocylon-2 | 607529 | 583470 | 134.185 | 354.6457 | 1092.139 | 97.2841 | 257.1181 | 791.8009 | 48.64205 | 128.5591 | 546.0696 |
| T1 | Terminalia ivorensis-1 | 607540 | 583496 | 111.9304 | 317.9409 | 1021.757 | 81.14954 | 230.5072 | 740.7738 | 40.57477 | 115.2536 | 510.8785 |
| T2 | Terminalia ivorensis-2 | 607524 | 583475 | 40.78227 | 118.9394 | 556.4214 | 29.56714 | 86.23106 | 403.4055 | 14.78357 | 43.11553 | 278.2107 |
| T3 | Terminalia ivorensis-3 | 607455 | 583498 | 81.97492 | 266.6577 | 793.8251 | 59.43181 | 193.3268 | 575.5232 | 29.71591 | 96.66342 | 396.9126 |
| AF1 | Albizia ferruginea-1 | 607539 | 583472 | 79.33555 | 367.4645 | 1023.754 | 57.51827 | 266.4118 | 742.2214 | 28.75914 | 133.2059 | 511.8768 |
| AF2 | Albizia ferruginea-2 | 607480 | 583474 | 115.4459 | 313.344 | 782.0426 | 83.69825 | 227.1744 | 566.9809 | 41.84912 | 113.5872 | 391.0213 |
| AF3 | Albizia ferruginea-3 | 607513 | 583452 | 135.4323 | 332.761 | 779.6736 | 98.18845 | 241.2517 | 565.2634 | 49.09423 | 120.6258 | 389.8368 |

W, green weight; wd, dry weight; wc, weight of carbon.

|  | TREE | GPS COODINATES | | 2017 (D) INCHES |  | 2018 (D) INCHES |  | 2019(D) INCHES | | (H) FEETS | (H) FEETS | (H) FEETS |
| --- | --- | --- | --- | --- | --- | --- | --- | --- | --- | --- | --- | --- |
| Tree code |  | X | Y | <11 | D2 | <11 | D2 |  | D2 | 2017 | 2018 | 2019 |
| A1 | Asanfna-1 | 607540 | 583495 | 6.38 | 40.7044 | 8.86 | 78.4996 | 9.44 | 89.1136 | 5.6 | 8.87 | 10.3 |
| A2 | Asanfna-2 | 607524 | 583475 | 6.62 | 43.8244 | 8.24 | 67.8976 | 9.36 | 87.6096 | 6.9 | 11.37 | 13.83 |
| C1 | Cedrela-1 | 607455 | 583497 | 6.51 | 42.3801 | 8.78 | 77.0884 | 10.15 | 103.0225 | 9.9 | 13.21 | 12.65 |
| C2 | Cedrela-2 | 607541 | 583409 | 5.86 | 34.3396 | 8.5 | 72.25 | 10.8 | 116.64 | 3.9 | 5.7 | 8 |
| C3 | Cedrela-3 | 607532 | 583470 | 5.08 | 25.8064 | 7.3 | 53.29 | 8.37 | 70.0569 | 9.2 | 11.5 | 13.08 |
| C4 | Cedrela-4 | 607529 | 583471 | 5.48 | 30.0304 | 7.93 | 62.8849 | 9.22 | 85.0084 | 9.6 | 13.2 | 15.7 |
| E1 | Emire-1 | 607480 | 583474 | 6.97 | 48.5809 | 8.91 | 79.3881 | 9.72 | 94.4784 | 3.3 | 5.87 | 8 |
| E2 | Emire-2 | 607503 | 583452 | 5.46 | 29.8116 | 7.58 | 57.4564 | 9.5 | 90.25 | 3.6 | 5.36 | 7.93 |
| E3 | Emire-3 | 607443 | 583565 | 5.03 | 25.3009 | 9.65 | 93.1225 | 10.4 | 108.16 | 3.7 | 5.48 | 8.05 |
| ED1 | Edinam-1 | 607506 | 583468 | 5.51 | 30.3601 | 7.09 | 50.2681 | 9.1 | 82.81 | 3.7 | 5.6 | 8 |
| ED2 | Edinam-2 | 607522 | 583533 | 5.81 | 33.7561 | 8.92 | 79.5664 | 10.66 | 113.6356 | 3.1 | 5.62 | 9.33 |
| ED3 | Edinam-3 | 607495 | 583574 | 6.26 | 39.1876 | 8.04 | 64.6416 | 9.75 | 95.0625 | 3.3 | 6.44 | 10.41 |
| G1 | Glicidea-1 | 607456 | 583568 | 5.25 | 27.5625 | dead | dead | dead | dead | 10.2 | dead | dead |
| G2 | Glicidea-2 | 607504 | 583572 | 6.26 | 39.1876 | 9.7 | 94.09 | 10.62 | 112.7844 | 9.9 | 14.76 | 15.2 |
| G3 | Glicidea-3 | 607543 | 583510 | 5.67 | 32.1489 | 7.48 | 55.9504 | 10 | 100 | 9.3 | 12.21 | 14.48 |
| G4 | Glicidea-4 | 607539 | 583436 | 6.77 | 45.8329 | dead | dead | dead | dead | 10.6 | dead | dead |
| K1 | Kyenken-1 | 607480 | 583515 | 6.03 | 36.3609 | 8.77 | 76.9129 | 9.3 | 86.49 | 8.3 | 11.29 | 13.7 |
| K2 | Kyenken-2 | 607498 | 583490 | 5.47 | 29.9209 | 8.04 | 64.6416 | 9.18 | 84.2724 | 6.9 | 9.9 | 13.46 |
| LI | Lucinea-1 | 607472 | 583584 | 5.18 | 26.8324 | 8.73 | 76.2129 | 10.5 | 110.25 | 9.9 | 13.53 | 15.2 |
| L2 | Lucinea-2 | 607445 | 583584 | 6.31 | 39.8161 | 8.45 | 71.4025 | 10.4 | 108.16 | 10.6 | 15.2 | 16.09 |
| CG1 | Cola gigantea-1 | 607495 | 583574 | 5.51 | 30.3601 | 7.02 | 49.2804 | 9.92 | 98.4064 | 9.2 | 14.2 | 15.5 |
| CG2 | Cola gigantea-2 | 607497 | 583580 | 6.86 | 47.0596 | 8.5 | 72.25 | 10.01 | 100.2001 | 8.3 | 12.3 | 14.32 |
| TS1 | Triplochiton sclerocylon-1 | 607532 | 583472 | 5.08 | 25.8064 | 8.3 | 68.89 | 10.55 | 111.3025 | 6.5 | 12.4 | 14.4 |
| TS2 | Triplochiton sclerocylon-2 | 607529 | 583470 | 6.4 | 40.96 | 8.3 | 68.89 | 10.6 | 112.36 | 9.1 | 14.3 | 16.2 |
| T1 | Terminalia ivorensis-1 | 607540 | 583496 | 6.97 | 48.5809 | 8.88 | 78.8544 | 10.55 | 111.3025 | 6.4 | 11.2 | 15.3 |
| T2 | Terminalia ivorensis-2 | 607524 | 583475 | 5.46 | 29.8116 | 7.6 | 57.76 | 10.7 | 114.49 | 3.8 | 5.72 | 8.1 |
| T3 | Terminalia ivorensis-3 | 607455 | 583498 | 5.03 | 25.3009 | 7.38 | 54.4644 | 9.29 | 86.3041 | 9 | 13.6 | 15.33 |
| AF1 | Albizia ferruginea-1 | 607539 | 583472 | 6.51 | 42.3801 | 8.93 | 79.7449 | 10.2 | 104.04 | 5.2 | 12.8 | 16.4 |
| AF2 | Albizia ferruginea-2 | 607480 | 583474 | 5.81 | 33.7561 | 8 | 64 | 9.3 | 86.49 | 9.5 | 13.6 | 15.07 |
| AF3 | Albizia ferruginea-3 | 607513 | 583452 | 6.26 | 39.1876 | 8.4 | 70.56 | 9.6 | 92.16 | 9.6 | 13.1 | 14.1 |

D, diameter; H, Height
